# Supplementary material
Source: PubMed Central journal article supplement (PMC5806123)

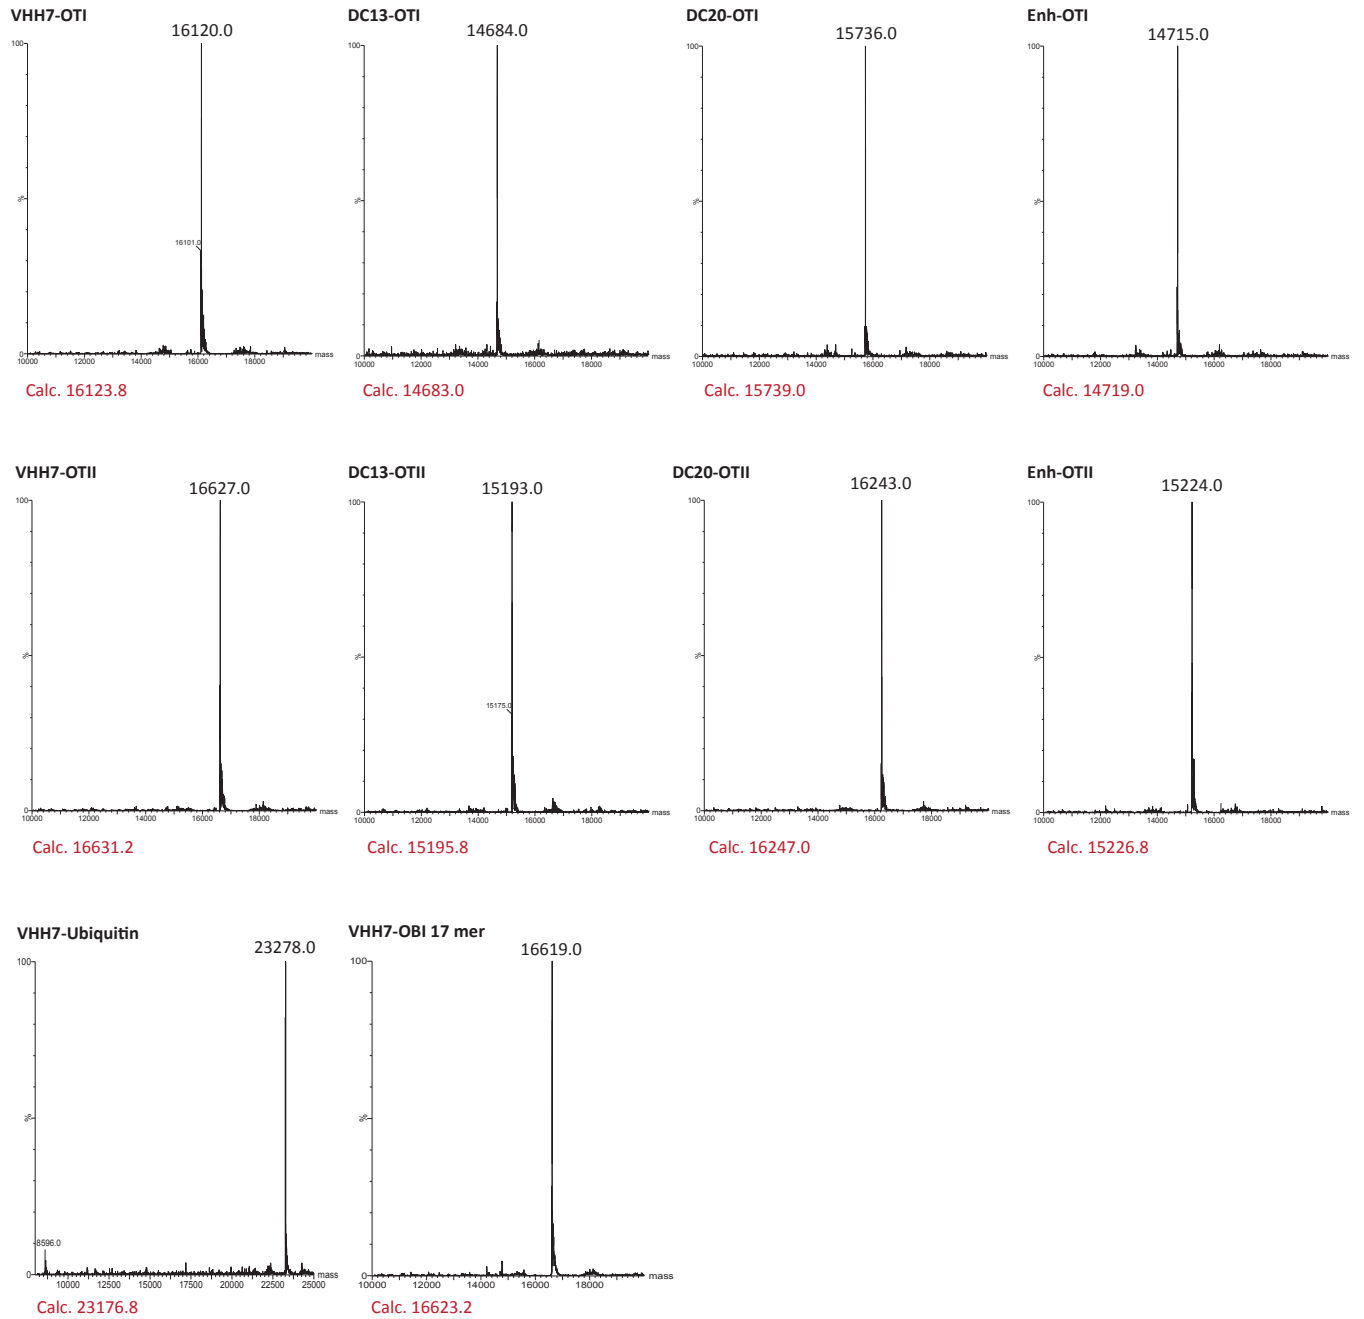

Supplementary Fig. 1 - LC-MS of purified VHH constructs

Supplement: NIHMS939407-supplement-Figure_1.pdf [file NIHMS939407-supplement-Figure_1.pdf]
